# Supplementary material for: The Changing Nature of Hazardous Weather and Implications for Transportation: Example from Oklahoma, USA
Source: MDPI journal article supplement (doi:10.3390/cli11020032), 2023-01-20
Supplement: s1 [file s1]

Archive with 1 entries (1 files):
- climate-2075245-supplementary.pdf
